# Supplementary material for: Ultrafine copper nanoclusters and single sites for Fenton-like reactions with high atom utilities
Source: Royal Society of Chemistry journal article supplement (doi:10.1039/d0en00505c), 2020-01-01
Supplement: d0en00505c1.pdf [file d0en00505c1.pdf]

## Electronic Supplementary Information

### Ultrafine copper nanoclusters and single sites for Fenton-like reactions with high atom utilities

Yu Yin<sup>a,b</sup>, Wenlang Li<sup>c</sup>, Chunli Xu<sup>a</sup>, Lei Shi<sup>b</sup>, Lai-Chang Zhang<sup>b</sup>, Zhimin Ao<sup>c</sup>, Mengxuan Liu<sup>a</sup>, Min Lu<sup>a</sup>, Xiaoguang Duan<sup>d</sup>, Shaobin Wang<sup>d,\*</sup>, Shaomin Liu<sup>e</sup>, and Hongqi Sun<sup>b,\*</sup>

<sup>a</sup> School of Environmental and Chemical Engineering, Jiangsu University of Science and Technology, Zhenjiang, 212003, China

<sup>b</sup> School of Engineering, Edith Cowan University, 270 Joondalup Drive, Joondalup, WA 6027, Australia

<sup>c</sup> Guangdong Key Laboratory of Environmental Catalysis and Health Risk Control, Institute of Environmental Health and Pollution Control, School of Environmental Science and Engineering, Guangdong University of Technology, Guangzhou, 510006, China

<sup>d</sup> School of Chemical Engineering, The University of Adelaide, Adelaide, SA 5005, Australia

<sup>e</sup> WA School of Mines: Minerals, Energy and Chemical Engineering, Curtin University, WA 6102, Australia

\* Corresponding Authors

Email: h.sun@ecu.edu.au (H. Sun); shaobin.wang@adelaide.edu.au (S. Wang)

## **Supporting Experimental Section**

### **Experimental Section**

#### **Characterizations.**

The copper loadings were determined by inductively coupled plasma optical emission spectrometry (ICP-OES) on an Optima 7300 DV instrument (PerkinElmer Corporation). Transmission electron microscopy (TEM) images were taken on a JEM-200CX electron microscope operated at 200 kV. Fourier transform infrared (FT-IR) spectroscopy was recorded on a PerkinElmer instrument. The thermal decomposition profiles were measured on a thermogravimetric analyzer (PerkinElmer TGA 4000) by heating samples from room temperature to 900 °C at a rate of 10 °C·min<sup>-1</sup> in 20 mL·min<sup>-1</sup> of an air flow.

## Supporting Results and Discussion

Cu sites in UNCu-SBA are highly dispersed in the form of ultra-small nanoclusters combining with single atoms. However, copper aggregated into particles in APCu-SBA. The only difference between UNCu-SBA and APCu-SBA during the synthesis route was employing SBA-15 with or without P123 as the support. The proposed mechanism for the better dispersion of Cu sites in UNCu-SBA than APCu-SBA was then investigated according to the results of FT-IR and TG profiles. As shown in Figures S6A and S6C, on the spectra of P123/SBA, the stretching and bending vibrations at 2850 – 3000 and 1350 – 1500  $\text{cm}^{-1}$  results from P123. The peaks appeared at 960  $\text{cm}^{-1}$  are ascribed to silicon hydroxyl (Si-OH) groups. Notably, after annealing, the P123 peaks disappear entirely, and the Si-OH signals greatly decline on the spectra of SBA-15 (Figures S6B and S6D). These observations indicate that total P123 and massive Si-OH have been removed in SBA-15. That is to say, P123/SBA-15 reserves more Si-OH than SBA-15, which is regarded as the link between the host of SBA-15 and guest of Cu sites in the form of Si-O-Cu. More Si-OH are favorable to the formation of Si-O-Cu and less CuO, thus no large CuO particles.

Figure S7 describes the TG and DTG curves of P123/SBA-15, UNCu-SBA and APCu-SBA. A sharp weight loss on P123/SBA-15 centering at 184 °C is attributed to the decomposition of P123. This temperature is found to be lower than the pure P123 (210 °C), which should be as a result of the catalysis of silica walls to P123. It should be pointed out that the temperature for P123 decomposition in UNCu-SBA greatly improves up to about 280 °C. This gives evidence for the incorporation of  $\text{Cu}(\text{NO}_3)_2$  into the confined space between P123 and silica walls, therefore P123 is separated from the silica walls. In addition,  $\text{Cu}(\text{NO}_3)_2$  decomposition takes place at about 200 °C, prior to the destroy of P123. Consequently, the aggregation of copper species are restricted because of the confined space in P123/SBA-15. In summary, the synergistic effect of abundant Si-OH and confined space in P123/SBA-15 lead to the formation of ultra-small CuO nanoclusters and single atom Cu. Less Si-OH and loss of confined space give rise to the CuO particle aggregation.

## Supporting Figures and Tables

**Table S1.** Textural properties of SBA-15, UNCu-SBA and APCu-SBA samples.

| Sample        | Cu loading <sup>a</sup><br>(mmol·g <sup>-1</sup> (SBA-15)) | $S_{\text{BET}}$<br>(m <sup>2</sup> ·g <sup>-1</sup> ) | $V_p$<br>(cm <sup>3</sup> ·g <sup>-1</sup> ) | $D_p$ (nm) |            | $a_0$ <sup>b</sup><br>(nm) |
|---------------|------------------------------------------------------------|--------------------------------------------------------|----------------------------------------------|------------|------------|----------------------------|
|               |                                                            |                                                        |                                              | adsorption | desorption |                            |
| SBA-15        | –                                                          | 796                                                    | 1.023                                        | 8.2        | 6.3        | 10.8                       |
| 0.125UNCu-SBA | 0.126                                                      | 783                                                    | 0.992                                        | 9.1        | 6.9        | 11.5                       |
| 0.25UNCu-SBA  | 0.25                                                       | 776                                                    | 0.993                                        | 8.7        | 6.9        | 11.5                       |
| 0.5UNCu-SBA   | 0.51                                                       | 684                                                    | 0.881                                        | 8.3        | 6.4        | 11.5                       |
| 1.0UNCu-SBA   | 1.03                                                       | 657                                                    | 0.855                                        | 8.2        | 6.4        | 11.5                       |
| 0.125APCu-SBA | 0.125                                                      | 661                                                    | 0.845                                        | 8.2        | 6.3        | 10.8                       |
| 0.25APCu-SBA  | 0.24                                                       | 624                                                    | 0.797                                        | 7.7        | 6.3        | 10.8                       |
| 0.5APCu-SBA   | 0.52                                                       | 605                                                    | 0.789                                        | 7.7        | 6.3        | 10.8                       |
| 1.0APCu-SBA   | 1.00                                                       | 596                                                    | 0.766                                        | 7.7        | 6.3        | 10.8                       |

<sup>a</sup> Determined by ICP-OES. <sup>b</sup> Unit cell constant calculated according to  $a_0 = 2 \times 3^{-1/2} \times d_{100}$ .

**Table S2.** Structural parameters extracted from the Fe K-edge EXAFS fitting. ( $S_0^2 = 0.87$ )

| Sample            | Scattering pair | CN   | R (nm) | $\sigma^2$ ( $10^{-3}\text{\AA}^2$ ) | $\Delta E_0$ (eV) | R factor |
|-------------------|-----------------|------|--------|--------------------------------------|-------------------|----------|
| Cu foil           | Cu-Cu           | 12   | 0.254  | 5.1                                  | 3.78              | 0.002    |
| Cu <sub>2</sub> O | Cu-O            | 2    | 0.185  | 6.2                                  | 6.81              | 0.030    |
| CuO               | Cu-O            | 4    | 0.195  | 3.1                                  | 2.57              | 0.010    |
| 0.5UNCu-SBA       | Cu-O            | 3.37 | 0.194  | 5.1                                  | 8.22              | 0.002    |
|                   | Cu-(O)-Si/Cu    | 3.54 | 0.281  | 9.5                                  | 9.81              |          |
|                   | Cu-(O)-Si/Cu    | 2.23 | 0.312  | 7.8                                  | 6.48              |          |
| 0.5APCu-SBA       | Cu-O            | 3.89 | 0.195  | 4.0                                  | 1.21              | 0.006    |
|                   | Cu-O            | 1.86 | 0.281  | 5.3                                  | 8.00              |          |
|                   | Cu-(O)-Cu       | 3.13 | 0.312  | 9.4                                  | 9.84              |          |

$S_0^2$  is the amplitude reduction factor; CN is the coordination number; R is interatomic distance (the bond length between central atoms and surrounding coordination atoms);  $\sigma^2$  is Debye-Waller factor (a measure of thermal and static disorder in absorber-scatterer distances);  $\Delta E_0$  is edge-energy shift (the difference between the zero kinetic energy value of the sample and that of the theoretical model). R factor is used to value the goodness of the fitting.

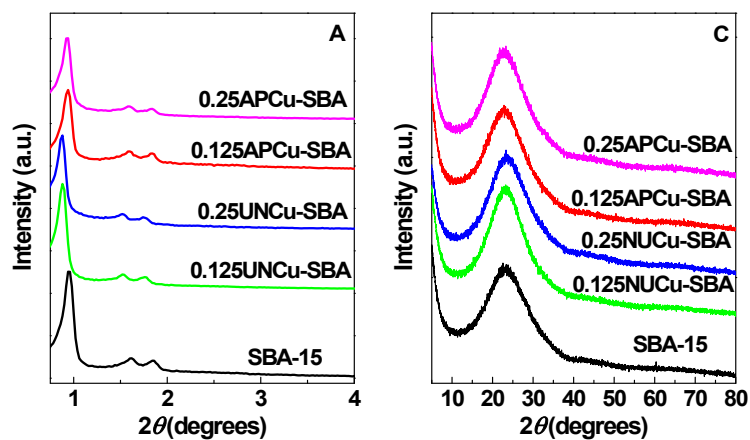

**Figure S1.** (A) Low-angle and (B) wide-angle XRD patterns of SBA-15, UNCu-SBA and APCu-SBA samples.

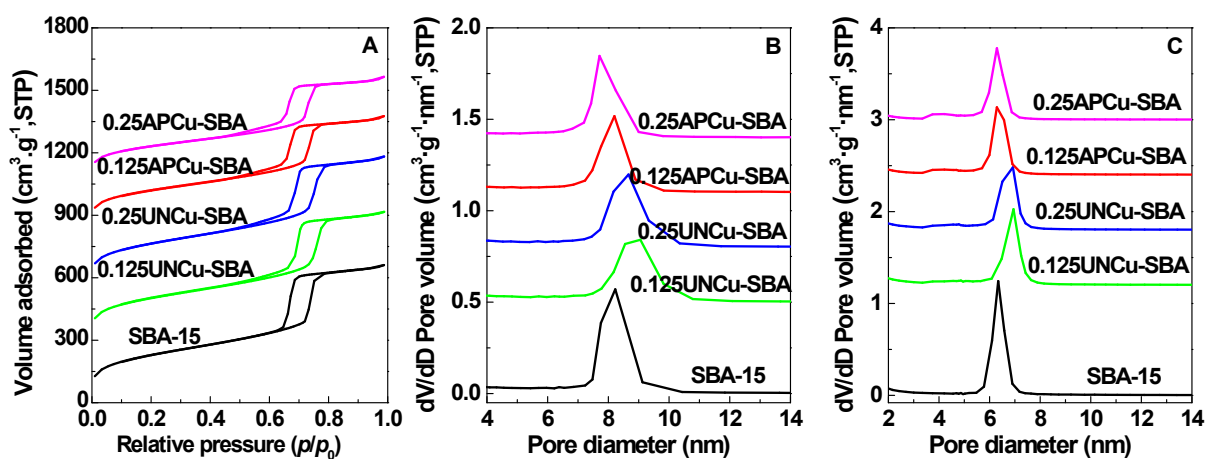

**Figure S2.** (A) N<sub>2</sub> adsorption-desorption isotherms and pore size distributions calculated by (B) adsorption and (C) desorption branches of the isotherms of SBA-15, UNCu-SBA and APCu-SBA samples. Curves are plotted offset for clarity.

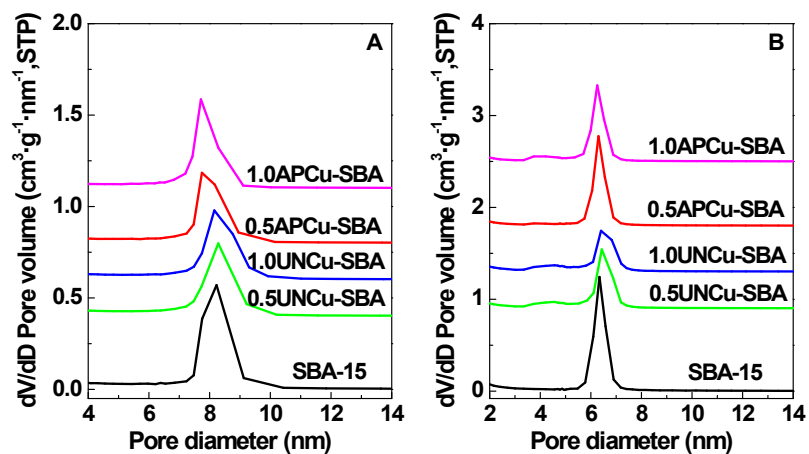

**Figure S3.** Pore size distributions calculated by (A) adsorption and (B) desorption branches of the isotherms of SBA-15, UNCu-SBA and APCu-SBA samples. Curves are plotted offset for clarity.

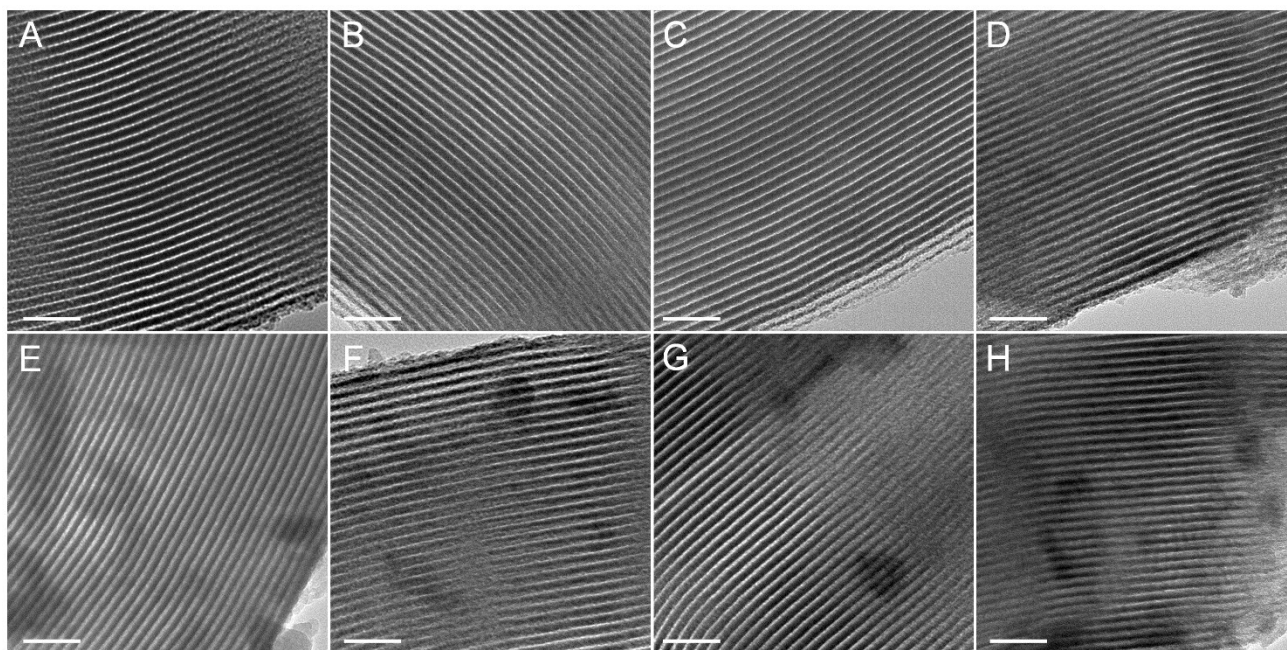

**Figure S4.** TEM images of (A) 0.125UNCu-SBA, (B) 0.25UNCu-SBA, (C) 0.5UNCu-SBA, (D) 1.0UNCu-SBA and (E) 0.125APCu-SBA, (F) 0.25APCu-SBA, (G) 0.5APCu-SBA, (H) 1.0APCu-SBA. Scale bars: 50 nm.

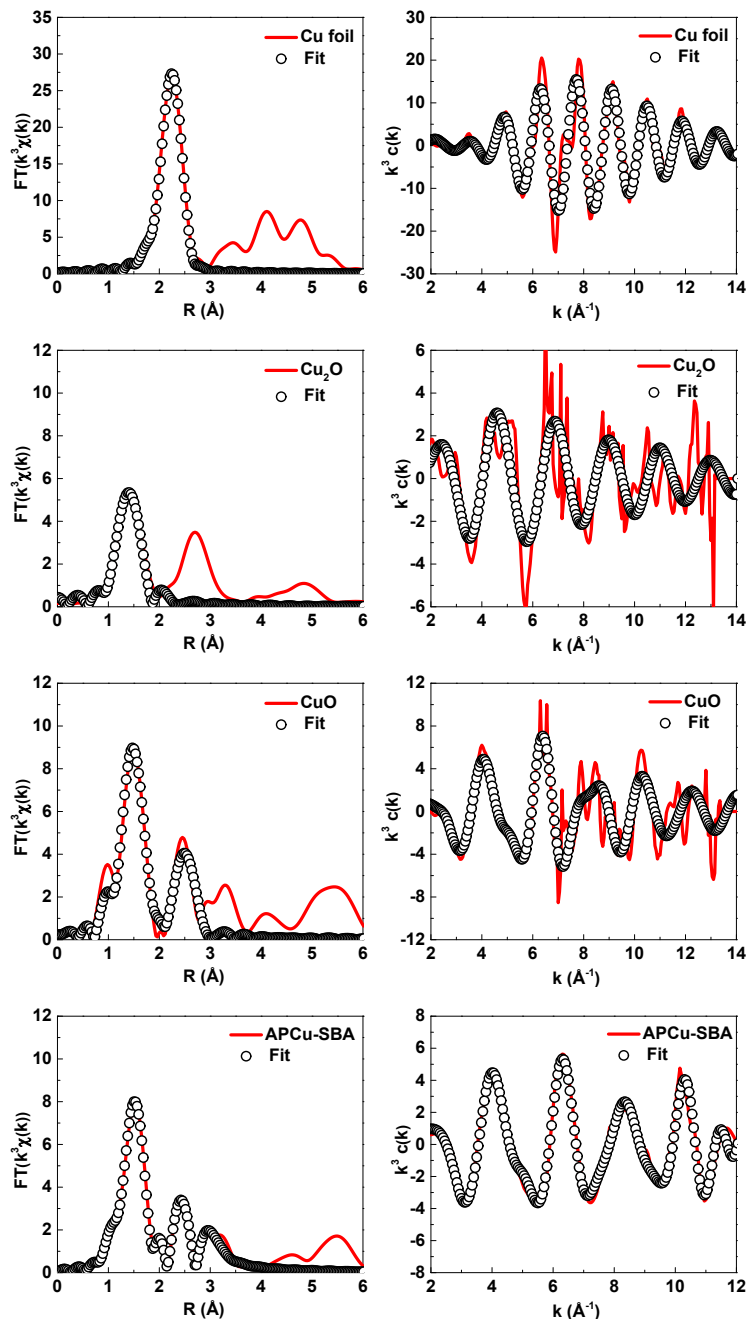

**Figure S5.** The EXAFS R, k space fitting curves of Cu foil, Cu<sub>2</sub>O, CuO and APCu-SBA.



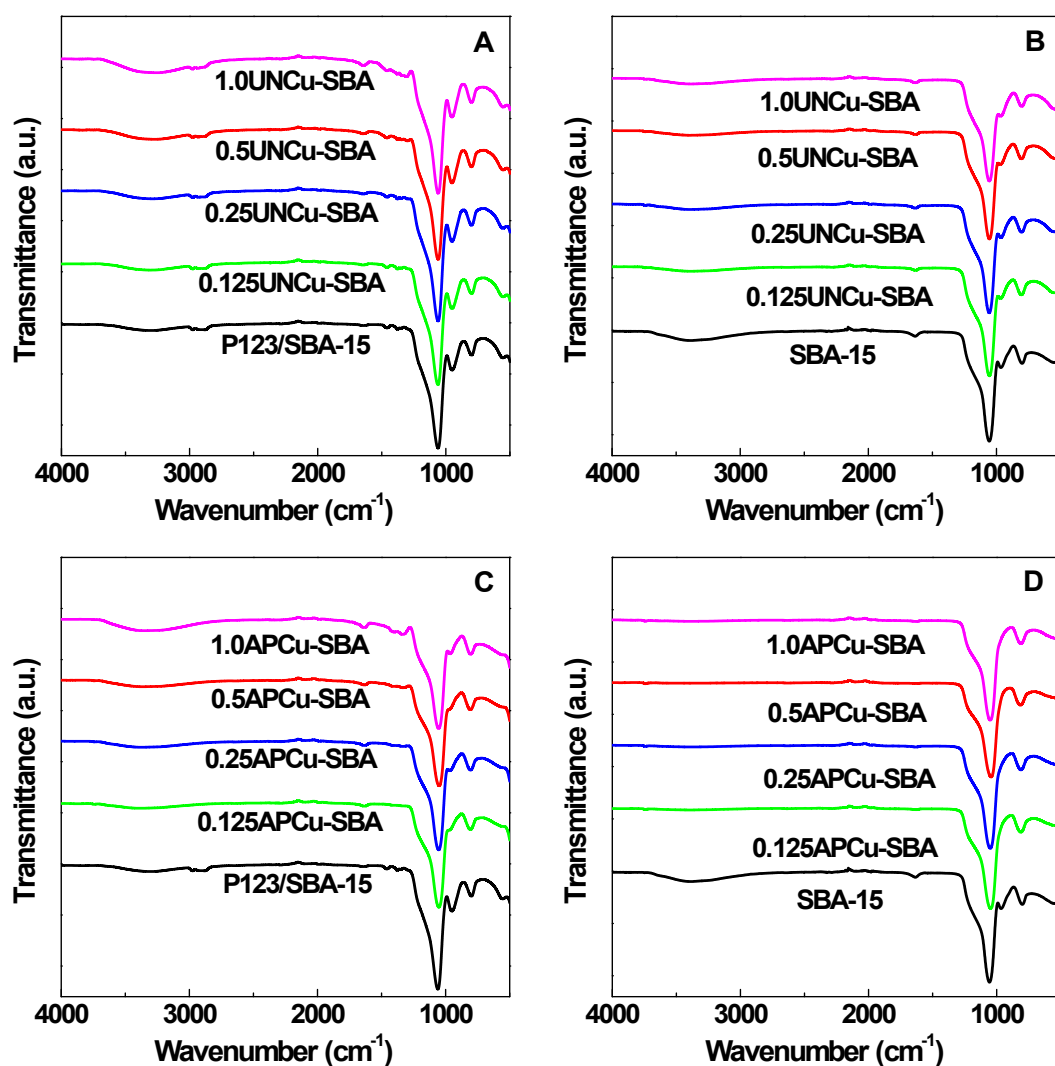

**Figure S6.** FT-IR spectra of SBA-15, UNCu-SBA and APCu-SBA samples. (A, C) before and (B, D) after annealing.

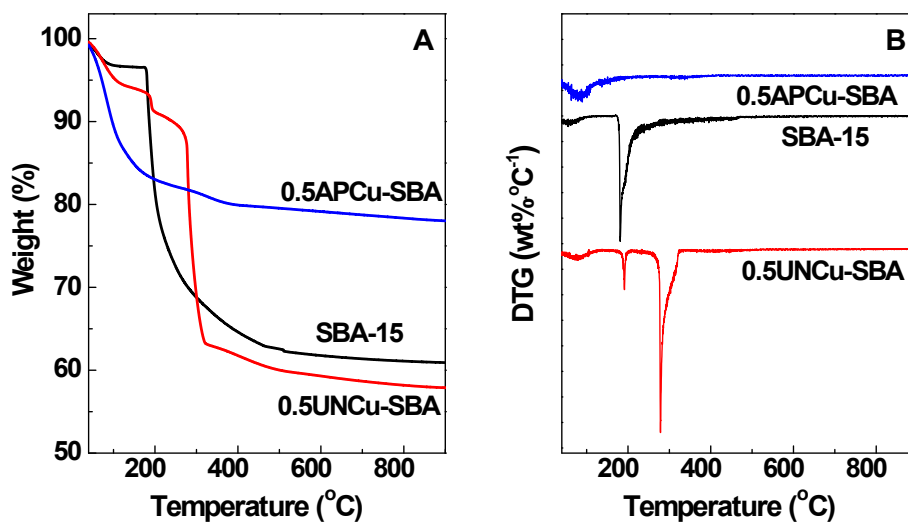

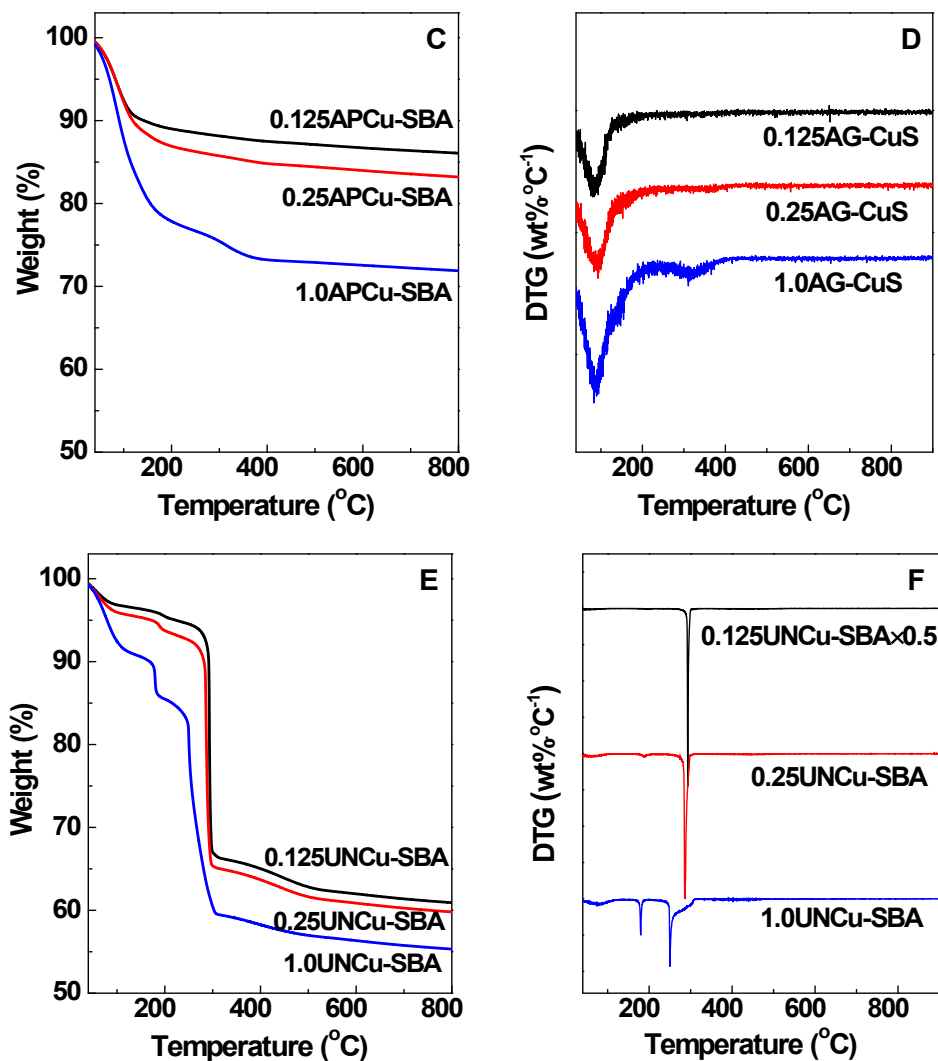

**Figure S7.** (A, C, E) TG and (B, D, F) DTG curves of SBA-15, UNCu-SBA and APCu-SBA samples before calcination. DTG curves are plotted offset for better clarity.

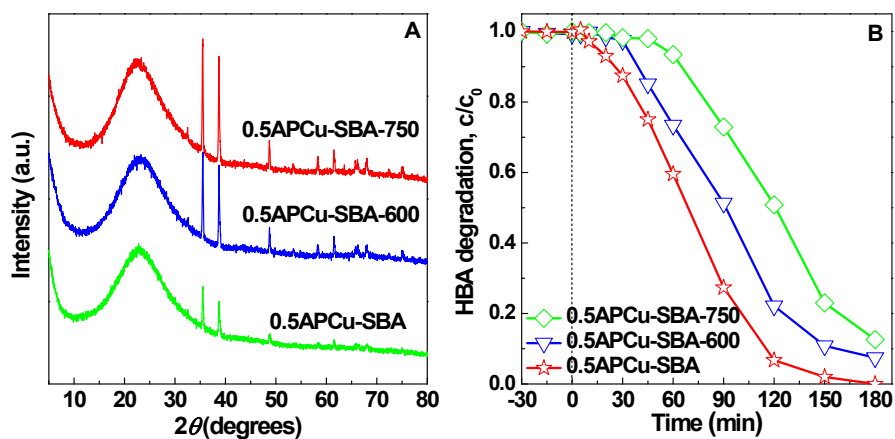

**Figure S8.** (A) Wide-angle XRD patterns, (B) adsorption and oxidation of HBA by  $\text{H}_2\text{O}_2$  activation on 0.5APCu-SBA-T catalysts. ( $[\text{Catalyst}]_0 = 0.2 \text{ g}\cdot\text{L}^{-1}$ ,  $[\text{H}_2\text{O}_2]_0 = 1000 \text{ ppm}$ ,  $[\text{T}] = 40 \text{ }^\circ\text{C}$ , and  $[\text{HBA}]_0 = 20 \text{ mg}\cdot\text{L}^{-1}$ ).

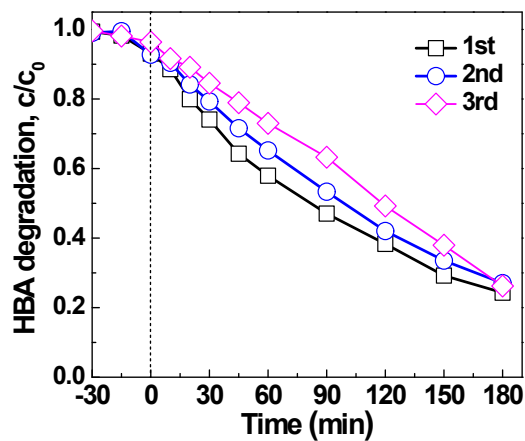

**Figure S9.** Cyclic adsorption and oxidation of HBA by  $\text{H}_2\text{O}_2$  activation on 0.5UNCu-SBA catalysts. ( $[\text{Catalyst}]_0 = 0.2 \text{ g}\cdot\text{L}^{-1}$ ,  $[\text{H}_2\text{O}_2]_0 = 1000 \text{ ppm}$ ,  $[\text{T}] = 40 \text{ }^\circ\text{C}$ , and  $[\text{HBA}]_0 = 20 \text{ mg}\cdot\text{L}^{-1}$ , constant pH = 7).
